# Supplementary material for: Inhibition of histone methyltransferase EZH2 in Schistosoma mansoni in vitro by GSK343 reduces egg laying and decreases the expression of genes implicated in DNA replication and noncoding RNA metabolism
Source: PLoS Negl Trop Dis. 2018 Oct 26;12(10):e0006873. doi: 10.1371/journal.pntd.0006873 (PMC6221359; doi:10.1371/journal.pntd.0006873)
Supplement: S9 Table — (XLSX) [file pntd.0006873.s010.xlsx]

## Sheet: DE gut genes
S9 Table. Gut (tab 1) and tegument (tab 2) genes whose expression was affected by GSK343 exposure in schistosomula, in male or in female adult worms.
Male Downregulated genes in treated worms
geneID	product description	FPKM control 1 cuffquant	FPKM control 2 cuffquant	FPKM control 3 cuffquant	FPKM treated 1 cuffquant	FPKM treated 2 cuffquant	FPKM treated 3 cuffquant	log2(fold change) cuffdiff	p-value cuffdiff	q-value cuffdiff	TPM control 1 kallisto	TPM control 2 kallisto	TPM control 3 kallisto	TPM treated 1 kallisto	TPM treated 2 kallisto	TPM treated 3 kallisto	b sleuth	p-value sleuth	q-value sleuth	TPM control 1 sailfish	TPM control 2 sailfish	TPM control 3 sailfish	TPM treated 1 sailfish	TPM treated 2 sailfish	TPM treated 3 sailfish	log2(fold change) edgeR	p-value edgeR	q-value edgeR	GO terms	UniProt annotation	human homologous: hit	human homologous: hit description
Smp_085840	MEG-4 (10.3) family;Smp_085840	746.458	355.615	659.046	26.0947	30.6625	78.8304	-3.69603	5e-05	0.000902234	1546.89	669.218	1427.51	62.6742	71.1061	166.119	-2.62732	2.61059e-10	9.35297e-08	1513.3	656.61	1420.95	62.4182	68.91	163.676	-3.71676	2.40214e-15	3.38731e-12		MEG-4 (10.3) family [Source:UniProtKB/TrEMBL;Acc:C4QKE8]	_	_
Smp_122630	MEG 1;Smp_122630	4.49209	2.36629	3.74295	0.776631	0.980487	0.934302	-1.96618	5e-05	0.000902234	10.4724	5.31305	8.87745	2.27499	3.29403	2.62796	-1.17466	2.60157e-09	6.76203e-07	12.2701	6.32736	10.4138	2.6603	3.57086	2.99851	-1.80161	3.6069e-10	1.04332e-07	GO:0016020,GO:0016021	MEG-1 family [Source:UniProtKB/TrEMBL;Acc:G4V5R6]	_	_
Smp_124000	MEG-14;Smp_124000	166.041	68.8565	189.591	23.0604	23.3792	49.2952	-2.15089	5e-05	0.000902234	729.381	321.149	897.773	103.919	130.563	217.595	-1.52319	5.89371e-05	0.0019009	689.004	303.212	856.594	99.7339	123.799	208.147	-2.21661	4.10207e-08	4.92292e-06	GO:0016020,GO:0016021	MEG-14 [Source:UniProtKB/TrEMBL;Acc:G4V6N9]	_	_
Smp_125320	MEG-9;Smp_125320	15.9927	8.5578	16.5436	2.40981	2.16682	4.8552	-2.09661	5e-05	0.000902234	180.638	89.9102	184.24	22.6764	26.7059	49.8634	-1.63458	1.99106e-06	0.000135351	173.391	86.0558	178.968	22.1559	25.3618	48.5037	-2.30253	1.01849e-09	2.55324e-07		MEG-9 [Source:UniProtKB/TrEMBL;Acc:G4V726]	_	_
Smp_163630	developmentally regulated antigen 10;MEG-4 (10.3) family;Smp_163630.2	294.208	143.627	351.549	20.4931	17.9848	60.8376	-3.03688	5e-05	0.000902234	1553.47	735.578	1754.21	112.542	110.086	303.984	-2.19401	7.79633e-07	6.61068e-05	1514.91	717.001	1709.24	110.105	106.667	300.614	-3.03052	8.11948e-10	2.12415e-07		MEG-4 (10.3) family [Source:UniProtKB/TrEMBL;Acc:G4V7K7]	_	_
SmVG_025682:Smp_163710	MEG 6;Smp_163710	75.8323	63.8049	78.3338	56.1349	44.9247	56.5209	-0.473223	0.00295	0.0259689	236.135	204.241	255	171.391	181.668	175.17	-0.375369	0.000219906	0.00499157	226.122	196.275	246.734	169.645	174.472	171.033	-0.538065	6.46996e-05	0.00165505		MEG-6 [Source:UniProtKB/TrEMBL;Acc:G4VTX1]	_	_
Smp_171190	MEG-8 family;Smp_171190	200.597	89.831	208.231	16.3503	16.5066	29.22	-3.03777	5e-05	0.000902234	503.349	216.034	531.526	42.7907	48.6639	73.2583	-2.07592	2.53082e-10	9.31905e-08	497.078	213.097	527.468	43.168	47.5146	73.9776	-3.04193	3.58133e-16	8.34276e-13		MEG-8 family [Source:UniProtKB/TrEMBL;Acc:G4VCW5]	_	_
Smp_172180	MEG-8 family;Smp_172180	1059.09	481.664	988.804	70.2548	90.8172	243.885	-2.63856	5e-05	0.000902234	2151.92	883.656	2112.61	160.045	212.621	497.548	-1.92041	2.82025e-05	0.0010805	2068.12	840.035	2057.31	156.748	204.551	481.148	-2.66806	5.65856e-08	6.0469e-06		MEG-8 family [Source:UniProtKB/TrEMBL;Acc:G4VLP3]	_	_
SmVG_007521:Smp_176020	MEG 11;Smp_176020	5.47035	3.17876	5.44078	0.663417	1.08344	1.49133	-2.09331	5e-05	0.000902234	45.3397	22.8501	51.5891	5.32077	6.95393	11.1134	-1.72623	1.93408e-07	2.21019e-05	42.9724	21.5742	49.1485	5.04975	6.62441	10.5941	-2.46445	1.24618e-11	6.11222e-09
Smp_155580	annexin;Smp_155580	34.4482	13.5643	37.0268	4.61964	3.34424	8.1711	-2.40146	5e-05	0.000902234	121.115	45.1095	134.932	17.4045	14.2329	27.7345	-1.6613	2.31005e-05	0.00091409	133.497	49.1473	145.366	19.0341	15.2594	31.3296	-2.43016	7.3254e-09	1.25209e-06	GO:0005509,GO:0005544	Annexin, putative [Source:UniProtKB/TrEMBL;Acc:G4LZM8]	gi|4809279|ref|NP_004025.1|	annexin A7 isoform 2 [Homo sapiens]
Smp_024820	tetraspanin family protein 16 invertebrate;Smp_024820	73.2217	77.9473	69.7812	49.9258	41.0966	64.6061	-0.50425	0.00045	0.0059	231.109	228.438	225.025	165.782	154.178	204.536	-0.377449	0.0056095	0.0464747	217.045	214.941	213.893	159.237	145.964	194.926	-0.521846	0.00249547	0.0242684	GO:0016020,GO:0016021	Tetraspanin, putative [Source:UniProtKB/TrEMBL;Acc:C4Q3U8]	gi|21264580|ref|NP_005716.2|	tetraspanin-2 [Homo sapiens]
Smp_194960	25 kDa integral membrane protein;Smp_194960	200.844	136.582	138.504	94.3322	64.2959	67.9765	-1.05982	5e-05	0.000902234	1095.65	730.162	736.58	629.518	381.024	426.164	-0.686443	0.000477469	0.00864879	1019.34	681.439	694.201	590.392	361.163	398.909	-0.980815	1.65822e-05	0.000595744	GO:0005887,GO:0007166,GO:0016020,GO:0016021	Similar to tetraspanin TE736 [Source:UniProtKB/TrEMBL;Acc:G4LW56]	_	_
Smp_031180	phospholipase A;Smp_031180	8.06306	2.31995	6.54346	0.394658	0.15847	0.746618	-3.70329	5e-05	0.000902234	27.0852	8.49229	22.149	1.58272	0.758319	2.01757	-2.62432	7.17399e-09	1.53385e-06	25.1641	7.89173	20.8518	1.47744	0.705191	1.8968	-3.84544	2.45418e-13	1.62857e-10	GO:0006629,GO:0008374,GO:0016740,GO:0016746	Phosphatidylcholine-sterol acyltransferase (Lecithin-cholesterol acyltransferase)/ Phospholipase A [Source:UniProtKB/TrEMBL;Acc:G4VPL2]	gi|6912484|ref|NP_036452.1|	group XV phospholipase A2 precursor [Homo sapiens]
Smp_031190	phospholipase A;Smp_031190	7.65056	2.32778	7.17614	1.10701	1.49862	1.39784	-2.09212	5e-05	0.000902234	23.7487	6.72044	22.2858	3.55108	5.48791	4.76085	-1.31512	0.000900095	0.0132086	22.2805	6.31364	21.067	3.3536	5.08544	4.5191	-2.06939	2.9895e-06	0.00016292	GO:0006629,GO:0008374,GO:0016740,GO:0016746	Phosphatidylcholine-sterol acyltransferase (Lecithin-cholesterol acyltransferase)/ Phospholipase A [Source:UniProtKB/TrEMBL;Acc:G4VPL3]	gi|6912484|ref|NP_036452.1|	group XV phospholipase A2 precursor [Homo sapiens]
Smp_160880	phosphatidylcholine sterol acyltransferase;Smp_160880	65.337	57.5042	58.915	34.5908	32.2963	44.7413	-0.699164	5e-05	0.000902234	167.988	139.55	158.797	106.529	92.5523	119.804	-0.486568	5.37946e-05	0.00178188	172.131	143.264	162.235	108.618	95.7719	123.369	-0.688379	2.87224e-05	0.000895077	GO:0006629,GO:0008374,GO:0016740,GO:0016746	Phosphatidylcholine-sterol acyltransferase (Lecithin-cholesterol acyltransferase)/ Phospholipase A [Source:UniProtKB/TrEMBL;Acc:G4VFW2]	gi|4557892|ref|NP_000220.1|	phosphatidylcholine-sterol acyltransferase precursor [Homo sapiens]
Smp_105450	saposin containing protein;Smp_105450.2	1013.75	1012.44	1030.79	311.625	479.804	692.838	-1.01367	5e-05	0.000902234	10272.8	9268.9	9164.33	3642.08	4591.83	7452.66	-0.748133	0.0023473	0.025652	9573.58	8670.18	8690.67	3431.41	4343.31	6975.57	-0.993085	0.000287922	0.00518858	GO:0001664,GO:0005737,GO:0006629,GO:0008047,GO:0043085	Saposin containing protein [Source:UniProtKB/TrEMBL;Acc:G4VC39]	_	_
Smp_103610	cathepsin B peptidase (C01 family);Smp_103610	2481	2264.99	1872.62	695.174	804.546	1322.63	-1.29162	5e-05	0.000902234	6599.65	5578.67	5486.72	1941.13	3049.67	3471.95	-0.864368	3.90219e-05	0.00139804	7287.14	6307.52	6023.17	2137.82	3280.63	3869.66	-1.22337	7.78876e-07	5.29307e-05	GO:0004197,GO:0005615,GO:0005764,GO:0006508,GO:0008233,GO:0008234,GO:0016787,GO:0050790,GO:0051603	Cathepsin B-like cysteine proteinase [Source:UniProtKB/Swiss-Prot;Acc:P25792]	gi|22538431|ref|NP_680090.1|	cathepsin B preproprotein [Homo sapiens]
Smp_016490	Saposin B domain containing protein;Smp_016490	1914.65	1939.96	1516.08	772.676	653.749	1365.07	-0.918829	5e-05	0.000902234	5212.91	4791.74	4253.07	2418.65	2002.16	3841.19	-0.682294	0.00511379	0.0433483	4967.29	4566.97	4104.82	2335.21	1931.71	3684.97	-0.909428	0.000669764	0.00956763		Putative uncharacterized protein [Source:UniProtKB/TrEMBL;Acc:G4VHH3]	_	_
Smp_139240	cathepsin S (C01 family);Smp_139240	780.038	621.658	617.048	315.084	291.279	509.82	-0.900902	5e-05	0.000902234	1925.74	1409.18	1603.34	955.799	782.183	1310.23	-0.599213	0.00311397	0.0309204	1747.25	1306.94	1467.35	856.55	717.667	1210.76	-0.822927	0.000487249	0.00757115	GO:0004197,GO:0005615,GO:0005764,GO:0006508,GO:0008234,GO:0016020,GO:0016021,GO:0051603	Peptidase C1 family [Source:UniProtKB/TrEMBL;Acc:G4LUT7]	gi|23110962|ref|NP_004070.3|	cathepsin S isoform 1 preproprotein [Homo sapiens]
Female Downregulated genes in treated worms
geneID	product description	FPKM control 1 cuffquant	FPKM control 2 cuffquant	FPKM control 3 cuffquant	FPKM treated 1 cuffquant	FPKM treated 2 cuffquant	FPKM treated 3 cuffquant	log2(fold change) cuffdiff	p-value cuffdiff	q-value cuffdiff	TPM control 1 kallisto	TPM control 2 kallisto	TPM control 3 kallisto	TPM treated 1 kallisto	TPM treated 2 kallisto	TPM treated 3 kallisto	b sleuth	p-value sleuth	q-value sleuth	TPM control 1 sailfish	TPM control 2 sailfish	TPM control 3 sailfish	TPM treated 1 sailfish	TPM treated 2 sailfish	TPM treated 3 sailfish	log2(fold change) edgeR	p-value edgeR	q-value edgeR	GO terms	UniProt annotation	human homologous: hit	human homologous: hit description
Smp_085840	MEG-4 (10.3) family;Smp_085840	70.1561	94.6487	44.309	18.2562	31.4196	30.921	-1.40038	5e-05	0.000984357	124.299	154.92	69.4147	29.449	58.3947	47.6763	-0.924672	0.000563776	0.00926169	120.194	152.929	66.6563	29.191	58.6496	47.5552	-1.32051	7.97e-05	0.00183799		MEG-4 (10.3) family [Source:UniProtKB/TrEMBL;Acc:C4QKE8]	_	_
Smp_070240	venom allergen-like (VAL) 7 protein;Smp_070240	13.0716	13.0566	7.10699	3.25057	7.11319	5.58999	-1.09277	5e-05	0.000984357	44.625	46.9052	23.3522	12.046	23.7117	19.0117	-0.741868	0.00302445	0.0297816	42.6039	45.1049	22.1761	11.5117	22.9086	18.4106	-1.04884	0.000938664	0.0111507	GO:0016020,GO:0016021
Smp_041450	asparaginyl tRNA synthetase;Smp_041450	126.533	111.712	132.146	85.4622	59.8049	71.5289	-0.755154	5e-05	0.000984357	206.273	158.125	187.235	118.35	83.6105	99.4771	-0.625042	0.000105826	0.00270775	196.22	154.027	178.129	115.192	83.1713	97.5291	-0.836454	1.5e-05	0.000493009	GO:0000166,GO:0003676,GO:0004812,GO:0004815,GO:0004816,GO:0005524,GO:0005737,GO:0006412,GO:0006418,GO:0006421,GO:0016874	Aspartyl-tRNA synthetase, putative [Source:UniProtKB/TrEMBL;Acc:G4LWW1]	gi|4758762|ref|NP_004530.1|	asparaginyl-tRNA synthetase, cytoplasmic [Homo sapiens]
Smp_053510	aspartyl tRNA synthetase cytoplasmic;Smp_053510	70.9583	65.1548	87.501	52.6876	37.9165	49.9912	-0.675406	5e-05	0.000984357	188.051	154.28	191.632	119.091	84.8972	105.825	-0.565661	0.00062736	0.00994763	178.749	149.688	182.044	115.037	84.0131	102.55	-0.760045	9e-05	0.00201006	GO:0000166,GO:0003676,GO:0004812,GO:0004815,GO:0005524,GO:0005737,GO:0006412,GO:0006418,GO:0006422,GO:0016874	Putative aspartyl-tRNA synthetase [Source:UniProtKB/TrEMBL;Acc:G4VJ11]	gi|45439306|ref|NP_001340.2|	aspartyl-tRNA synthetase, cytoplasmic [Homo sapiens]
SmVG_009174:Smp_210300	phospholipase DDHD1;Smp_210300	126.443	101.584	115.713	83.7387	54.689	69.5751	-0.732015	5e-05	0.000984357	273.023	199.914	214.668	156.603	116.027	133.419	-0.54454	0.000215534	0.00463327	255.102	189.981	201.251	147.868	110.45	125.976	-0.734214	0.000135027	0.00267438		Putative 60s ribosomal protein L7a [Source:UniProtKB/TrEMBL;Acc:G4VDZ4]	gi|237757344|ref|NP_001153619.1|	phospholipase DDHD1 isoform b [Homo sapiens]
Schistosomula Downregulated genes in treated worms
geneID	product description	FPKM control 1 cuffquant	FPKM control 2 cuffquant	FPKM control 3 cuffquant	FPKM control 4 cuffquant	FPKM treated 1 cuffquant	FPKM treated 2 cuffquant	FPKM treated 3 cuffquant	FPKM treated 4 cuffquant	log2(fold change) cuffdiff	p-value cuffdiff	q-value cuffdiff	TPM control 1 kallisto	TPM control 2 kallisto	TPM control 3 kallisto	TPM control 4 kallisto	TPM treated 1 kallisto	TPM treated 2 kallisto	TPM treated 3 kallisto	TPM treated 4 kallisto	b sleuth	p-value sleuth	q-value sleuth	TPM control 1 sailfish	TPM control 2 sailfish	TPM control 3 sailfish	TPM control 4 sailfish	TPM treated 1 sailfish	TPM treated 2 sailfish	TPM treated 3 sailfish	TPM treated 4 sailfish	log2(fold change) edgeR	p-value edgeR	q-value edgeR	GO terms	UniProt annotation	human homologous: hit	human homologous: hit description
Smp_016490	Saposin B domain containing protein;Smp_016490	82.9954	38.2476	21.9783	26.6306	14.6212	1.48185	4.43913	9.58091	-2.49533	5e-05	0.00235817	113.257	67.6918	58.5344	53.4915	16.0565	4.68705	13.8429	21.69	-1.74814	0.000806464	0.0409698	56.5027	51.5503	35.3415	33.5721	7.29432	2.56307	7.86465	13.2988	-2.523	0.000168099	0.0116829		Putative uncharacterized protein [Source:UniProtKB/TrEMBL;Acc:G4VHH3]	_	_
Smp_139240	cathepsin S (C01 family);Smp_139240	76.0328	73.0453	41.2746	45.8934	27.3846	13.0889	18.0196	21.9884	-1.55356	5e-05	0.00235817	90.5558	117.848	84.7308	92.9899	30.1721	26.4115	34.94	42.4564	-1.08654	1.03271e-05	0.00234058	41.3584	77.4029	55.801	54.1346	11.8194	15.0401	23.1238	27.3291	-1.54952	3.9016e-06	0.000895462	GO:0004197,GO:0005615,GO:0005764,GO:0006508,GO:0008234,GO:0016020,GO:0016021,GO:0051603	Peptidase C1 family [Source:UniProtKB/TrEMBL;Acc:G4LUT7]	gi|23110962|ref|NP_004070.3|	cathepsin S isoform 1 preproprotein [Homo sapiens]
Smp_194910	Saposin B domain containing protein;Smp_194910	195.029	137.2	72.9513	79.5881	58.1272	13.8598	23.9126	38.4626	-1.85117	5e-05	0.00235817	244.207	250.319	157.608	172.021	68.0288	33.0784	51.2877	84.5991	-1.30467	0.0011487	0.0497998	118.625	165.541	108.499	99.8752	27.5568	18.46	32.4583	55.1765	-1.84239	0.000202188	0.0132145		Putative uncharacterized protein [Source:UniProtKB/TrEMBL;Acc:G4VHH1]	_	_
Smp_137720	hypothetical protein;Smp_137720	68.2729	63.7467	35.0873	31.8953	16.5092	4.41504	13.9782	16.1273	-1.96338	5e-05	0.00235817	106.037	148.903	94.0227	97.9875	26.9542	11.7615	31.832	44.4314	-1.46052	0.000222535	0.017946	56.0817	103.656	68.6505	58.1814	10.8887	7.24535	22.3093	29.6315	-2.03581	1.68649e-05	0.00254829		Putative uncharacterized protein [Source:UniProtKB/TrEMBL;Acc:G4VBE1]	_	_
Smp_103610	cathepsin B peptidase (C01 family);Smp_103610	1172.99	1666.39	850.851	963.018	481.941	142.85	350.813	624.462	-1.54011	5e-05	0.00235817	1818.91	4127.06	2546.81	2855.56	667.063	426.918	1031.47	1913.28	-1.16689	0.00105378	0.0478435	875.529	2728.07	1763.82	1725.47	288.598	250.681	687.046	1189.8	-1.52102	0.000416943	0.0225627	GO:0004197,GO:0005615,GO:0005764,GO:0006508,GO:0008233,GO:0008234,GO:0016787,GO:0050790,GO:0051603	Cathepsin B-like cysteine proteinase [Source:UniProtKB/Swiss-Prot;Acc:P25792]	gi|22538431|ref|NP_680090.1|	cathepsin B preproprotein [Homo sapiens]
Smp_085840	MEG-4 (10.3) family;Smp_085840	3905.51	3195.92	1845.51	1607.86	665.636	336.121	387.986	549.623	-2.44424	5e-05	0.00235817	10572	11214.6	8900.46	6058.43	1414.95	1455.76	2009.52	2016.59	-1.68245	7.93772e-09	9.15378e-06	2753.27	4459.55	3347.35	2442.97	356.546	501.639	663.842	868.053	-2.46119	4.51744e-11	6.36895e-08		MEG-4 (10.3) family [Source:UniProtKB/TrEMBL;Acc:C4QKE8]	_	_
Smp_124000	MEG-14;Smp_124000	1052.51	851.663	469.589	435.939	103.557	71.1621	92.1793	137.722	-2.79577	5e-05	0.00235817	2112	2435.79	1685.4	1608.56	194.492	238.182	313.777	524.463	-1.90039	3.99226e-12	1.15097e-08	991.935	1598.58	1165.62	951.745	79.236	138.686	197.026	328.59	-2.79263	3.21899e-13	1.58841e-09	GO:0016020,GO:0016021	MEG-14 [Source:UniProtKB/TrEMBL;Acc:G4V6N9]	_	_
Smp_125320	MEG-9;Smp_125320	83.9197	68.9478	36.5364	35.5249	18.177	11.0205	15.5319	19.5069	-1.80801	5e-05	0.00235817	123.889	150.905	90.8682	86.8705	23.8759	31.7227	42.6157	49.2126	-1.15487	1.39793e-05	0.00287874	81.5567	131.102	79.5421	65.0167	15.2966	23.8951	33.2573	35.4518	-1.80164	1.22832e-06	0.000356539		MEG-9 [Source:UniProtKB/TrEMBL;Acc:G4V726]	_	_
Smp_163630	developmentally regulated antigen 10;MEG-4 (10.3) family;Smp_163630.2	66.6018	36.8124	22.6611	20.3133	10.1487	2.89607	3.16839	7.48325	-2.62706	5e-05	0.00235817	240.939	237.072	186.943	188.532	24.4524	21.321	34.8714	73.0293	-1.85026	3.39397e-08	2.32505e-05	119.493	153.906	127.014	109.147	10.4668	11.4623	21.5219	43.6695	-2.67772	2.3035e-09	2.27333e-06		MEG-4 (10.3) family [Source:UniProtKB/TrEMBL;Acc:G4V7K7]	_	_
Smp_171190	MEG-8 family;Smp_171190	738.204	512.685	231.839	284.41	139.961	64.8104	61.663	87.5115	-2.31982	5e-05	0.00235817	1364.32	1492.05	952.021	1031.92	217.91	244.654	229.13	337.629	-1.5674	1.882e-08	1.66948e-05	674.54	977.861	608.027	594.795	96.3159	142.738	142.702	218.84	-2.28334	9.66313e-09	7.3358e-06		MEG-8 family [Source:UniProtKB/TrEMBL;Acc:G4VCW5]	_	_
Smp_172180	MEG-8 family;Smp_172180	4424.87	2443.82	1198.07	1084.09	363.634	154.65	236.373	387.496	-3.00215	5e-05	0.00235817	4818.82	4025.92	2529.1	2187.05	338.721	343.774	534.377	790.022	-1.94384	1.81531e-07	9.96866e-05	2444.35	2801.81	1738.96	1323.97	158.596	194.415	315.452	523.087	-2.99037	7.81937e-09	6.43078e-06		MEG-8 family [Source:UniProtKB/TrEMBL;Acc:G4VLP3]	_	_
SmVG_007521:Smp_176020	MEG 11;Smp_176020	10.5051	15.0749	9.42461	9.75318	3.75706	3.78558	4.48075	4.96412	-1.39767	0.0004	0.0133469	21.2825	37.0105	32.0669	31.7261	6.77992	12.2892	14.3632	18.5883	-0.918607	1.68273e-14	9.7026e-11	11.7092	27.5415	24.876	20.8017	3.27234	7.78056	10.2086	11.3527	-1.3995	1.11087e-12	2.78285e-09
Smp_070240	venom allergen-like (VAL) 7 protein;Smp_070240	544.556	587.569	396.444	296.309	83.4785	47.9546	88.9106	113.3	-2.45142	5e-05	0.00235817	1086.5	1615.28	1316.81	969.343	146.628	165.818	285.297	399.368	-1.6963	1.90478e-11	3.66098e-08	505.956	1037.94	882.002	562.014	64.0193	96.856	187.336	238.853	-2.40249	1.12791e-12	2.78285e-09	GO:0016020,GO:0016021
Smp_095630	TetraspaninIPR000301 CD9:CD37:CD63;Smp_095630	217.757	173.596	167.44	155.371	92.9106	72.5304	108.164	122.605	-0.849991	0.0017	0.0436571	331.629	419.57	438.059	384.881	121.928	192.882	258.556	335.679	-0.63331	3.17774e-05	0.00531096	162.835	281.364	317.528	239.456	51.0414	115.353	178.824	212.811	-0.923824	0.000158684	0.0112419	GO:0005887,GO:0007166,GO:0016020,GO:0016021	CD9-like protein Sm-TSP-1 [Source:UniProtKB/TrEMBL;Acc:Q86D97]	gi|283135199|ref|NP_570139.3|	tetraspanin-18 [Homo sapiens]
Smp_174190	Tetraspanin 18 (Tspan 18);Smp_174190	15.8968	13.2731	12.668	11.7104	4.77665	4.19188	5.90193	7.89997	-1.23368	5e-05	0.00235817	18.6643	24.6508	28.1376	23.4559	5.61676	9.45063	12.1486	17.39	-0.845919	4.3301e-07	0.000199739	9.82269	17.6793	20.974	15.2739	2.47688	6.10352	8.63448	11.5793	-1.21522	4.55846e-06	0.000934376	GO:0005887,GO:0007166,GO:0016020,GO:0016021	Tetraspanin, putative [Source:UniProtKB/TrEMBL;Acc:G4LZV5]	_	_
Smp_194960	25 kDa integral membrane protein;Smp_194960	19.2102	17.9378	5.49956	14.3914	0.778793	0.419481	0.75656	7.28265	-2.62638	5e-05	0.00235817	28.8436	38.473	16.5739	42.3237	1.17207	0.888673	1.70947	17.5698	-2.4971	0.000214716	0.0176865	13.6727	23.6498	10.7467	24.5124	0.494566	0.688864	1.11319	10.2019	-2.81362	0.000698819	0.0309859	GO:0005887,GO:0007166,GO:0016020,GO:0016021	Similar to tetraspanin TE736 [Source:UniProtKB/TrEMBL;Acc:G4LW56]	_	_
Smp_031180	phospholipase A;Smp_031180	52.9083	36.1163	26.1587	25.4591	11.0587	3.6993	10.2774	13.0172	-1.88596	5e-05	0.00235817	83.4682	78.4514	67.042	65.4458	12.6576	8.22605	22.7101	33.1814	-1.49458	5.51092e-05	0.0074767	42.3386	54.8663	48.3741	40.8043	5.93037	5.41668	15.6578	21.8053	-2.04769	3.50529e-06	0.000823659	GO:0006629,GO:0008374,GO:0016740,GO:0016746	Phosphatidylcholine-sterol acyltransferase (Lecithin-cholesterol acyltransferase)/ Phospholipase A [Source:UniProtKB/TrEMBL;Acc:G4VPL2]	gi|6912484|ref|NP_036452.1|	group XV phospholipase A2 precursor [Homo sapiens]
SmVG_023113:Smp_142970	palmitoyl protein thioesterase 1;Smp_142970	31.3168	24.8166	16.0643	15.3738	7.04911	2.17903	4.23504	8.68355	-1.98337	5e-05	0.00235817	39.4725	47.5563	32.3434	32.3985	7.73678	5.13282	9.88515	20.1376	-1.39994	0.000135646	0.0133698	22.3773	36.4267	27.1593	22.7456	3.94973	3.56713	7.18513	14.3632	-1.9564	8.36259e-06	0.00147376		Putative palmitoyl-protein thioesterase [Source:UniProtKB/TrEMBL;Acc:G4VNU1]	gi|4506031|ref|NP_000301.1|	palmitoyl-protein thioesterase 1 isoform 1 precursor [Homo sapiens]
SmVG_023113:Smp_142980	palmitoyl protein thioesterase;Smp_142980	31.3168	24.8166	16.0643	15.3738	7.04911	2.17903	4.23504	8.68355	-1.98337	5e-05	0.00235817	39.4725	47.5563	32.3434	32.3985	7.73678	5.13282	9.88515	20.1376	-1.39994	0.000135646	0.0133698	22.3773	36.4267	27.1593	22.7456	3.94973	3.56713	7.18513	14.3632	-1.9564	8.36259e-06	0.00147376		Putative palmitoyl-protein thioesterase [Source:UniProtKB/TrEMBL;Acc:G4VNU2]	gi|4506031|ref|NP_000301.1|	palmitoyl-protein thioesterase 1 isoform 1 precursor [Homo sapiens]
Male Upregulated genes in treated worms
geneID	product description	FPKM control 1 cuffquant	FPKM control 2 cuffquant	FPKM control 3 cuffquant	FPKM treated 1 cuffquant	FPKM treated 2 cuffquant	FPKM treated 3 cuffquant	log2(fold change) cuffdiff	p-value cuffdiff	q-value cuffdiff	TPM control 1 kallisto	TPM control 2 kallisto	TPM control 3 kallisto	TPM treated 1 kallisto	TPM treated 2 kallisto	TPM treated 3 kallisto	b sleuth	p-value sleuth	q-value sleuth	TPM control 1 sailfish	TPM control 2 sailfish	TPM control 3 sailfish	TPM treated 1 sailfish	TPM treated 2 sailfish	TPM treated 3 sailfish	log2(fold change) edgeR	p-value edgeR	q-value edgeR	GO terms	UniProt annotation	human homologous: hit	human homologous: hit description
Smp_077880	annexin;Smp_077880	64.2962	133.723	74.959	281.511	149.306	197.676	1.18672	5e-05	0.000902234	154.993	296.826	185.161	794.597	418.123	493.659	0.882652	0.00318383	0.0314024	147.149	282.607	174.641	751.413	391.494	470.246	1.24032	6.40922e-05	0.00164783	GO:0005509,GO:0005544	Putative annexin [Source:UniProtKB/TrEMBL;Acc:G4VL82]	_	_
Smp_169610	zinc finger DHHC type containing 2;Smp_169610	99.2942	114.162	105.417	220.89	153.413	156.743	0.753255	5e-05	0.000902234	320.407	352.503	344.84	801.581	544.882	538.445	0.496269	0.000239676	0.00531606	300.921	330.71	327.512	764.961	517.708	510.177	0.738473	1.69689e-05	0.000603866	GO:0008270,GO:0016020,GO:0016021,GO:0016740,GO:0016746,GO:0019706,GO:0046872	Putative zinc finger protein [Source:UniProtKB/TrEMBL;Acc:G4VJH0]	gi|7705949|ref|NP_057437.1|	palmitoyltransferase ZDHHC2 [Homo sapiens]
Female Upregulated genes in treated worms
geneID	product description	FPKM control 1 cuffquant	FPKM control 2 cuffquant	FPKM control 3 cuffquant	FPKM treated 1 cuffquant	FPKM treated 2 cuffquant	FPKM treated 3 cuffquant	log2(fold change) cuffdiff	p-value cuffdiff	q-value cuffdiff	TPM control 1 kallisto	TPM control 2 kallisto	TPM control 3 kallisto	TPM treated 1 kallisto	TPM treated 2 kallisto	TPM treated 3 kallisto	b sleuth	p-value sleuth	q-value sleuth	TPM control 1 sailfish	TPM control 2 sailfish	TPM control 3 sailfish	TPM treated 1 sailfish	TPM treated 2 sailfish	TPM treated 3 sailfish	log2(fold change) edgeR	p-value edgeR	q-value edgeR	GO terms	UniProt annotation	human homologous: hit	human homologous: hit description
SmVG_023113:Smp_142970	palmitoyl protein thioesterase 1;Smp_142970	15.0521	20.4303	15.8978	26.9107	28.1972	24.1499	0.627483	5e-05	0.000984357	58.8172	73.8823	53.1662	93.9426	99.2245	80.7565	0.374359	0.000476001	0.0081673	54.8855	69.4796	49.6909	88.9867	94.4681	76.3564	0.579065	0.000443222	0.00658056		Putative palmitoyl-protein thioesterase [Source:UniProtKB/TrEMBL;Acc:G4VNU1]	gi|4506031|ref|NP_000301.1|	palmitoyl-protein thioesterase 1 isoform 1 precursor [Homo sapiens]
SmVG_023113:Smp_142980	palmitoyl protein thioesterase;Smp_142980	15.0521	20.4303	15.8978	26.9107	28.1972	24.1499	0.627483	5e-05	0.000984357	58.8172	73.8823	53.1662	93.9426	99.2245	80.7565	0.374359	0.000476001	0.0081673	54.8855	69.4796	49.6909	88.9867	94.4681	76.3564	0.579065	0.000443222	0.00658056		Putative palmitoyl-protein thioesterase [Source:UniProtKB/TrEMBL;Acc:G4VNU2]	gi|4506031|ref|NP_000301.1|	palmitoyl-protein thioesterase 1 isoform 1 precursor [Homo sapiens]
Smp_043210	tetraspanin;Smp_043210	35.0176	35.5298	35.7584	49.6331	49.2794	48.7518	0.478515	0.0012	0.0133497	93.27	86.5581	81.5707	114.323	124.591	112.975	0.278587	0.000559789	0.0092425	86.8439	82.1112	76.4374	108.409	118.445	107.056	0.4486	0.000329725	0.00530047	GO:0005887,GO:0007166,GO:0016020,GO:0016021	Putative tetraspanin [Source:UniProtKB/TrEMBL;Acc:G4VIX7]	_	_
Smp_140140	tetraspanin CD63 receptor;Smp_140140	3.82827	5.09691	3.9285	6.04208	8.00095	6.62475	0.666728	0.00025	0.00389112	10.793	13.7582	9.09964	15.2988	25.0198	17.2661	0.509091	0.000720731	0.0108864	10.1796	12.9918	8.55197	14.5041	23.7462	16.4591	0.778857	0.000350372	0.0055496	GO:0005887,GO:0007166,GO:0016020,GO:0016021	Tetraspanin, putative [Source:UniProtKB/TrEMBL;Acc:G4M0W2]	_	_
Smp_174190	Tetraspanin 18 (Tspan 18);Smp_174190	4.20812	3.39909	2.98538	5.30461	7.47728	7.04522	0.8756	5e-05	0.000984357	10.5604	7.86659	6.48976	11.3522	20.8613	16.3766	0.638255	0.000192422	0.00428817	9.94417	7.51737	6.11338	10.7086	19.5979	15.3388	0.96399	9.01689e-05	0.00201006	GO:0005887,GO:0007166,GO:0016020,GO:0016021	Tetraspanin, putative [Source:UniProtKB/TrEMBL;Acc:G4LZV5]	_	_
Smp_077880	annexin;Smp_077880	39.0275	35.0905	38.3772	68.7844	89.2227	85.0242	1.09184	5e-05	0.000984357	82.0095	67.7786	70.5161	131.092	194.44	163.066	0.771162	9.23327e-20	2.42392e-16	77.2878	64.3909	65.6059	126.185	186.738	155.048	1.1759	6.80379e-16	5.67017e-13	GO:0005509,GO:0005544	Putative annexin [Source:UniProtKB/TrEMBL;Acc:G4VL82]	_	_
Schistosomula Upregulated genes in treated worms
geneID	product description	FPKM control 1 cuffquant	FPKM control 2 cuffquant	FPKM control 3 cuffquant	FPKM control 4 cuffquant	FPKM treated 1 cuffquant	FPKM treated 2 cuffquant	FPKM treated 3 cuffquant	FPKM treated 4 cuffquant	log2(fold change) cuffdiff	p-value cuffdiff	q-value cuffdiff	TPM control 1 kallisto	TPM control 2 kallisto	TPM control 3 kallisto	TPM control 4 kallisto	TPM treated 1 kallisto	TPM treated 2 kallisto	TPM treated 3 kallisto	TPM treated 4 kallisto	b sleuth	p-value sleuth	q-value sleuth	TPM control 1 sailfish	TPM control 2 sailfish	TPM control 3 sailfish	TPM control 4 sailfish	TPM treated 1 sailfish	TPM treated 2 sailfish	TPM treated 3 sailfish	TPM treated 4 sailfish	log2(fold change) edgeR	p-value edgeR	q-value edgeR	GO terms	UniProt annotation	human homologous: hit	human homologous: hit description
No DE gut genes found.

## Sheet: DE tegument genes
S9 Table. Gut (tab 1) and tegument (tab 2) genes whose expression was affected by GSK343 exposure in schistosomula, in male or in female adult worms.
Male Downregulated genes in treated worms
geneID	product description	FPKM control 1 cuffquant	FPKM control 2 cuffquant	FPKM control 3 cuffquant	FPKM treated 1 cuffquant	FPKM treated 2 cuffquant	FPKM treated 3 cuffquant	log2(fold change) cuffdiff	p-value cuffdiff	q-value cuffdiff	TPM control 1 kallisto	TPM control 2 kallisto	TPM control 3 kallisto	TPM treated 1 kallisto	TPM treated 2 kallisto	TPM treated 3 kallisto	b sleuth	p-value sleuth	q-value sleuth	TPM control 1 sailfish	TPM control 2 sailfish	TPM control 3 sailfish	TPM treated 1 sailfish	TPM treated 2 sailfish	TPM treated 3 sailfish	log2(fold change) edgeR	p-value edgeR	q-value edgeR	GO terms	UniProt annotation	human homologous: hit	human homologous: hit description
Smp_005740	Aquaporin 9 (AQP 9) (Small solute channel 1);Smp_005740	831.444	991.731	831.244	464.541	498.588	651.811	-0.73786	5e-05	0.000902234	1418.62	1493.97	1503.25	857.977	1070.65	1091.06	-0.48809	1.10802e-05	0.000515366	1437.92	1549.01	1523.39	891.66	1087.35	1138.05	-0.697908	2.37323e-05	0.000773769	GO:0005215,GO:0005887,GO:0006810,GO:0006833,GO:0009992,GO:0015204,GO:0015250,GO:0015254,GO:0015793,GO:0016020,GO:0016021,GO:0034220,GO:0071918	Aquaporin; Putative aquaporin-3 [Source:UniProtKB/TrEMBL;Acc:C4PYI6]	gi|341916256|ref|XP_003403433.1|	PREDICTED: aquaporin-7-like isoform 1 [Homo sapiens]
Smp_081920	hypothetical protein;Smp_081920	53.4453	49.018	46.1048	26.7419	26.0783	31.1839	-0.828981	5e-05	0.000902234	242.563	213.679	212.857	109.052	112.91	135.443	-0.733136	8.58262e-10	2.64584e-07	227.005	199.929	201.481	102.922	107.205	128.02	-1.04135	2.19282e-10	7.49612e-08	GO:0016020,GO:0016021	Putative uncharacterized protein [Source:UniProtKB/TrEMBL;Acc:G4VAS2]	_	_
Smp_141010	dysferlin1;Smp_141010	72.0644	67.5755	74.8783	52.0435	50.0766	59.3804	-0.412386	0.00575	0.0424958	167.499	141.95	182.544	131.766	136.338	136.989	-0.293355	0.00094519	0.013619	156.979	133.078	172.427	125.852	128.251	130.231	-0.423128	0.00194021	0.0202765	GO:0005515,GO:0005887,GO:0007283,GO:0061025,GO:0016021,GO:0016020	Fer-1-related [Source:UniProtKB/TrEMBL;Acc:G4LV54]	gi|195976756|ref|NP_001124449.1|	dysferlin isoform 10 [Homo sapiens]
Smp_147070	sodium coupled neutral amino acid transporter;Smp_147070	66.8854	33.155	46.0368	16.3788	18.8173	21.035	-1.35329	5e-05	0.000902234	186.147	86.3064	133.164	56.2155	56.9005	61.8567	-0.897461	1.25807e-05	0.000569179	172.043	79.7541	124.289	52.1511	52.9503	57.3596	-1.34801	3.2388e-08	4.05966e-06	GO:0003333,GO:0005783,GO:0015171,GO:0016020,GO:0016021	Putative amino acid transporter [Source:UniProtKB/TrEMBL;Acc:G4VKU1]	gi|222418629|ref|NP_775785.2|	putative sodium-coupled neutral amino acid transporter 9 [Homo sapiens]
Smp_195190	13 kDa tegumental antigen Sm13;Smp_195190	1737.25	1393.74	1267.75	93.0076	189.412	320.153	-2.84672	5e-05	0.000902234	3399.83	2422.3	2639.32	216.384	425.334	642.598	-2.05754	3.2236e-09	7.87892e-07	3407.15	2410.55	2677.05	216.073	432.332	647.384	-2.82372	4.05946e-14	3.05299e-11		13 kDa tegumental antigen Sm13 [Source:UniProtKB/TrEMBL;Acc:Q7KPG1]	_	_
Smp_170820	ATP binding cassette subfamily B (MDR:TAP);Smp_170820	20.4079	17.7622	19.3774	5.94507	9.49969	11.0825	-1.12325	5e-05	0.000902234	51.9696	41.7877	51.7028	16.5357	29.0686	25.9401	-0.835911	8.30455e-06	0.000412304	49.3572	39.8198	49.4248	16.0835	27.587	25.1647	-1.16504	2.36867e-07	1.96478e-05	GO:0000166,GO:0005524,GO:0006200,GO:0006810,GO:0006855,GO:0008559,GO:0016020,GO:0016021,GO:0016787,GO:0016887,GO:0017111,GO:0042626,GO:0042908,GO:0055085	Multidrug resistance protein 1, 2, 3 (P glycoprotein 1, 2, 3), putative [Source:UniProtKB/TrEMBL;Acc:G4M1X1]	gi|21536378|ref|NP_003733.2|	bile salt export pump [Homo sapiens]
Smp_017730	200-kDa GPI-anchored surface glycoprotein;Smp_017730	387.461	401.671	413.476	186.645	172.753	237.623	-1.01194	5e-05	0.000902234	1010.36	947.923	1122.75	550.864	512.917	621.215	-0.708426	2.5198e-08	4.28237e-06	941.947	885.865	1056.36	521.42	481.471	584.96	-1.00884	5.15273e-10	1.4532e-07	GO:0005515	200-kDa GPI-anchored surface glycoprotein [Source:UniProtKB/TrEMBL;Acc:G4VP56]	_	_
Smp_208060	cation transporting atpase worm;Smp_208060	62.2642	45.603	59.3706	32.996	45.1538	36.7426	-0.534834	0.0012	0.0127555	230.967	171.562	233.683	157.301	194.308	159.324	-0.318272	0.0002327	0.0052106	222.407	165.458	225.795	154.377	186.577	155.642	-0.4646	0.00189608	0.019953	GO:0000166,GO:0005524,GO:0005887,GO:0006812,GO:0006874,GO:0016020,GO:0016021,GO:0016787,GO:0019829,GO:0043231,GO:0046872,GO:0098655	Putative cation-transporting atpase worm [Source:UniProtKB/TrEMBL;Acc:G4VBM0]	_	_
Smp_124240	sodium:potassium dependent atpase beta subunit;Smp_124240	192.811	150.016	165.582	64.4207	69.9963	100.64	-1.09687	5e-05	0.000902234	443.772	326.516	399.959	172.474	183.42	237.3	-0.784481	2.26716e-07	2.44337e-05	414.991	306.056	378.654	163.667	172.742	224.407	-1.11378	8.84337e-09	1.47509e-06	GO:0005890,GO:0006813,GO:0006814,GO:0016020,GO:0016021	Putative sodium/potassium-dependent atpase beta subunit; Sodium/potassium ATPase1 beta subunit [Source:UniProtKB/TrEMBL;Acc:C4PY08]	gi|4502277|ref|NP_001668.1|	sodium/potassium-transporting ATPase subunit beta-1 [Homo sapiens]
Smp_136710	calcium transporting atpase;Smp_136710	122.888	128.794	118.377	64.4083	69.0773	104.837	-0.611211	5e-05	0.000902234	337.946	326.841	332.242	206.94	212.223	295.398	-0.450691	0.00560693	0.0464747	310.173	300.173	307.332	192.182	195.762	273.112	-0.614162	0.00205778	0.0211612	GO:0000166,GO:0005388,GO:0005524,GO:0005887,GO:0006810,GO:0006811,GO:0006812,GO:0006816,GO:0006874,GO:0016020,GO:0016021,GO:0016787,GO:0019829,GO:0033017,GO:0046872,GO:0070588,GO:0005783	Putative calcium-transporting atpase sarcoplasmic/endoplasmic reticulum type (Calcium pump) [Source:UniProtKB/TrEMBL;Acc:G4VFY5]	gi|10835220|ref|NP_004311.1|	sarcoplasmic/endoplasmic reticulum calcium ATPase 1 isoform a [Homo sapiens]
Smp_042140	tegument-allergen-like protein;Smp_042140	177.655	160.208	153.262	95.914	98.3276	130.255	-0.597046	5e-05	0.000902234	541.15	454.019	501.195	350.297	340.67	415.501	-0.405807	0.000172116	0.00419581	510.594	430.578	479	335.863	326.856	398.102	-0.567519	0.000293214	0.00525875	GO:0005509,GO:0005875,GO:0007017,GO:0030286	Putative dynein light chain [Source:UniProtKB/TrEMBL;Acc:G4VJT7]	_	_
Smp_077310	tegument-allergen-like protein;Smp_077310	13.6593	14.2045	13.0863	6.17153	6.64239	9.42318	-0.870502	0.0001	0.00166434	46.9378	47.9162	49.9365	27.8773	25.9327	35.0725	-0.597906	1.29628e-05	0.000583411	45.3417	46.5341	47.9546	27.0508	25.083	34.6307	-0.827903	0.000275883	0.00504535	GO:0005509,GO:0005875,GO:0007017,GO:0030286	Putative tegumental protein; Tegumental antigen [Source:UniProtKB/TrEMBL;Acc:G4VTN2]	_	_
Smp_086480	tegument-allergen-like protein;Sm21.7;Smp_086480	305.792	186.38	219.732	80.1746	77.5339	110.09	-1.39382	5e-05	0.000902234	787.699	449.974	590.723	250.913	216.53	297.42	-0.95654	4.50093e-07	4.23679e-05	727.648	414.824	552.77	232.424	201.819	275.885	-1.38765	1.17946e-09	2.83096e-07	GO:0005509,GO:0005875,GO:0007017,GO:0030286	Antigen Sm21.7 [Source:UniProtKB/Swiss-Prot;Acc:P32070]	_	_
Smp_086530	tegument-allergen-like protein;Sm20.8;Smp_086530	2106.3	1580.24	1776.01	770.987	749.908	1196.68	-1.01033	5e-05	0.000902234	5139.4	3513.73	4500.6	2203.51	1968.04	2987.45	-0.714035	0.000109193	0.00302117	4765.28	3258.73	4224.7	2063.27	1850.34	2782.43	-1.00287	7.52146e-06	0.000332711	GO:0005509,GO:0005875,GO:0007017,GO:0030286	Putative tegumental protein Sm 20.8; Sm 20.8; Tegumental antigen Sm20.8; Tegumental protein Sm 20.8 [Source:UniProtKB/TrEMBL;Acc:P91804]	_	_
Smp_169200	tegument-allergen-like protein;Smp_169200	84.8225	58.6168	75.3479	35.907	42.937	47.3487	-0.771459	5e-05	0.000902234	317.665	202.88	291.153	153.364	177.586	187.193	-0.537683	9.04964e-05	0.00263075	297.252	189.556	275.855	144.99	167.116	176.386	-0.78209	2.12027e-05	0.000713443	GO:0005509,GO:0005875,GO:0007017,GO:0030286	Tegumental antigen [Source:UniProtKB/TrEMBL;Acc:G4VA28]	_	_
Smp_195090	tegument-allergen-like protein;Smp_195090	109.074	61.0535	77.7706	26.1652	20.4446	34.4353	-1.61255	5e-05	0.000902234	282.429	150.106	216.752	82.1176	59.6542	96.1478	-1.09114	3.2853e-06	0.000200691	272.226	144.852	210.909	79.759	58.3814	93.8149	-1.57596	6.78695e-09	1.21529e-06	GO:0005509,GO:0005875,GO:0007017,GO:0030286	Putative uncharacterized protein [Source:UniProtKB/TrEMBL;Acc:G4VA29]	_	_
Female Downregulated genes in treated worms
geneID	product description	FPKM control 1 cuffquant	FPKM control 2 cuffquant	FPKM control 3 cuffquant	FPKM treated 1 cuffquant	FPKM treated 2 cuffquant	FPKM treated 3 cuffquant	log2(fold change) cuffdiff	p-value cuffdiff	q-value cuffdiff	TPM control 1 kallisto	TPM control 2 kallisto	TPM control 3 kallisto	TPM treated 1 kallisto	TPM treated 2 kallisto	TPM treated 3 kallisto	b sleuth	p-value sleuth	q-value sleuth	TPM control 1 sailfish	TPM control 2 sailfish	TPM control 3 sailfish	TPM treated 1 sailfish	TPM treated 2 sailfish	TPM treated 3 sailfish	log2(fold change) edgeR	p-value edgeR	q-value edgeR	GO terms	UniProt annotation	human homologous: hit	human homologous: hit description
Smp_005740	Aquaporin 9 (AQP 9) (Small solute channel 1);Smp_005740	141.515	117.292	116.302	70.4263	86.1984	80.2905	-0.667007	5e-05	0.000984357	218.418	152.575	158.711	94.4039	114.584	111.8	-0.505003	1.01e-07	1.18e-05	220.372	156.008	158.438	94.2861	116.968	115.996	-0.718684	2.81e-06	0.000138461	GO:0005215,GO:0005887,GO:0006810,GO:0006833,GO:0009992,GO:0015204,GO:0015250,GO:0015254,GO:0015793,GO:0016020,GO:0016021,GO:0034220,GO:0071918	Aquaporin; Putative aquaporin-3 [Source:UniProtKB/TrEMBL;Acc:C4PYI6]	gi|341916256|ref|XP_003403433.1|	PREDICTED: aquaporin-7-like isoform 1 [Homo sapiens]
Smp_170820	ATP binding cassette subfamily B (MDR:TAP);Smp_170820	8.06142	5.76412	6.35634	3.96576	3.67941	5.0108	-0.675088	0.00185	0.0185852	17.9882	12.3418	14.1715	7.73388	7.52646	9.92797	-0.58252	5.01e-05	0.0015523	16.8586	11.9005	13.3768	7.51609	7.4647	9.69904	-0.778053	0.000355967	0.00561361	GO:0000166,GO:0005524,GO:0006200,GO:0006810,GO:0006855,GO:0008559,GO:0016020,GO:0016021,GO:0016787,GO:0016887,GO:0017111,GO:0042626,GO:0042908,GO:0055085	Multidrug resistance protein 1, 2, 3 (P glycoprotein 1, 2, 3), putative [Source:UniProtKB/TrEMBL;Acc:G4M1X1]	gi|21536378|ref|NP_003733.2|	bile salt export pump [Homo sapiens]
Smp_195190	13 kDa tegumental antigen Sm13;Smp_195190	538.585	625.589	453.767	274.575	345.754	391.798	-0.626626	5e-05	0.000984357	896.832	988.327	650.257	424.054	629.276	606.316	-0.413959	0.00267591	0.0273978	895.777	984.917	651.756	430.784	633.974	606.836	-0.554979	0.00246745	0.0220929		13 kDa tegumental antigen Sm13 [Source:UniProtKB/TrEMBL;Acc:Q7KPG1]	_	_
Smp_015020	sodium potassium transporting ATPase alpha subunit;Smp_015020	21.5313	19.835	16.9483	11.4174	11.1619	13.7877	-0.696345	5e-05	0.000984357	45.7829	37.9811	27.6677	18.9168	22.6907	24.4684	-0.526164	3.12e-05	0.00105829	41.7847	34.8606	25.295	17.5955	21.21	22.7429	-0.717647	7.56e-05	0.00175103	GO:0000166,GO:0005391,GO:0005524,GO:0005887,GO:0006754,GO:0006810,GO:0006811,GO:0006812,GO:0006813,GO:0006814,GO:0006883,GO:0010107,GO:0010248,GO:0015077,GO:0015672,GO:0015991,GO:0016020,GO:0016021,GO:0016787,GO:0016820,GO:0019829,GO:0030007,GO:0036376,GO:0043231,GO:0046872	Sodium potassium transporting ATPase alpha subunit [Source:UniProtKB/TrEMBL;Acc:G4VGA5]	gi|28373113|ref|NP_777617.1|	sarcoplasmic/endoplasmic reticulum calcium ATPase 3 isoform f [Homo sapiens]
Smp_124240	sodium:potassium dependent atpase beta subunit;Smp_124240	83.4798	61.2792	50.6775	38.7653	45.1426	45.3741	-0.638794	5e-05	0.000984357	167.814	114.355	88.2989	66.9485	89.804	82.0775	-0.427471	0.00625572	0.0496349	155.419	107.98	82.0097	63.4063	85.1682	77.4258	-0.600744	0.00231004	0.0211555	GO:0005890,GO:0006813,GO:0006814,GO:0016020,GO:0016021	Putative sodium/potassium-dependent atpase beta subunit; Sodium/potassium ATPase1 beta subunit [Source:UniProtKB/TrEMBL;Acc:C4PY08]	gi|4502277|ref|NP_001668.1|	sodium/potassium-transporting ATPase subunit beta-1 [Homo sapiens]
Smp_045010	tegument-allergen-like protein;Smp_045010	92.4821	112.014	142.551	50.0256	52.4214	76.8493	-0.969473	5e-05	0.000984357	187.196	218.505	257.153	90.3118	115.244	147.417	-0.648045	0.000668821	0.010377	174.453	203.133	238.695	85.4607	110.658	136.803	-0.880907	8.86e-05	0.00198659	GO:0005509,GO:0005875,GO:0007017,GO:0030286	Putative 22.6kDa tegument-associated antigen; Tegumental antigen [Source:UniProtKB/TrEMBL;Acc:G4VR24]	_	_
Smp_124460	ATP binding cassette sub family E;Smp_124460	50.5752	46.8995	53.9931	34.4885	26.2392	32.9103	-0.710727	5e-05	0.000984357	100.836	85.5509	94.0352	60.6079	49.0286	57.4601	-0.53863	4.56e-06	0.000228344	94.8276	81.7349	88.8098	58.0394	47.3651	55.2766	-0.722891	7.89e-06	0.000300009	GO:0000166,GO:0005524,GO:0006200,GO:0009055,GO:0016887,GO:0017111,GO:0051536	ATP-binding cassette, sub-family E (Oabp),member, putative [Source:UniProtKB/TrEMBL;Acc:G4LXI8]	gi|108773782|ref|NP_002931.2|	ATP-binding cassette sub-family E member 1 [Homo sapiens]
Smp_164540	cation transporting ATPase 13A1;Smp_164540	30.4381	33.3373	38.5752	24.0956	25.5045	25.7743	-0.458339	0.00265	0.023864	64.682	65.1649	71.2549	45.5391	52.8915	49.1617	-0.330087	4.12e-05	0.0013299	60.4824	62.1484	66.8716	43.4251	50.85	46.879	-0.436427	0.0016629	0.0168898	GO:0000166,GO:0005524,GO:0005887,GO:0006200,GO:0006812,GO:0006874,GO:0016020,GO:0016021,GO:0016787,GO:0016887,GO:0019829,GO:0043231,GO:0046872,GO:0098655	Putative cation-transporting atpase 13a1 (G-box binding protein) [Source:UniProtKB/TrEMBL;Acc:G4V9Z4]	gi|170016077|ref|NP_065143.2|	probable cation-transporting ATPase 13A1 [Homo sapiens]
Smp_208060	cation transporting atpase worm;Smp_208060	37.4255	37.1567	43.6297	26.4175	21.2369	26.3064	-0.670982	0.00065	0.00834424	133.772	128.555	127.692	93.4385	92.8286	97.8468	-0.336619	4.03e-05	0.0013091	127.689	125.796	122.977	90.967	91.1774	95.1672	-0.445812	0.00127611	0.0139228	GO:0000166,GO:0005524,GO:0005887,GO:0006812,GO:0006874,GO:0016020,GO:0016021,GO:0016787,GO:0019829,GO:0043231,GO:0046872,GO:0098655	Putative cation-transporting atpase worm [Source:UniProtKB/TrEMBL;Acc:G4VBM0]	_	_
Smp_040540	ATP binding cassette sub family F;Smp_040540	47.4616	40.834	48.9091	31.2804	26.527	28.1769	-0.660469	5e-05	0.000984357	76.8876	58.7322	70.0075	44.5391	36.8936	40.9205	-0.533496	1.7e-05	0.000667699	72.9838	56.4991	65.7492	41.6256	35.9555	39.054	-0.750625	4.26e-06	0.000192356	GO:0000166,GO:0005524,GO:0006200,GO:0016887,GO:0017111	Putative atp-dependent transporter [Source:UniProtKB/TrEMBL;Acc:G4VB63]	gi|10947135|ref|NP_001081.1|	ATP-binding cassette sub-family F member 1 isoform b [Homo sapiens]
Schistosomula Downregulated genes in treated worms
geneID	product description	FPKM control 1 cuffquant	FPKM control 2 cuffquant	FPKM control 3 cuffquant	FPKM control 4 cuffquant	FPKM treated 1 cuffquant	FPKM treated 2 cuffquant	FPKM treated 3 cuffquant	FPKM treated 4 cuffquant	log2(fold change) cuffdiff	p-value cuffdiff	q-value cuffdiff	TPM control 1 kallisto	TPM control 2 kallisto	TPM control 3 kallisto	TPM control 4 kallisto	TPM treated 1 kallisto	TPM treated 2 kallisto	TPM treated 3 kallisto	TPM treated 4 kallisto	b sleuth	p-value sleuth	q-value sleuth	TPM control 1 sailfish	TPM control 2 sailfish	TPM control 3 sailfish	TPM control 4 sailfish	TPM treated 1 sailfish	TPM treated 2 sailfish	TPM treated 3 sailfish	TPM treated 4 sailfish	log2(fold change) edgeR	p-value edgeR	q-value edgeR	GO terms	UniProt annotation	human homologous: hit	human homologous: hit description
Smp_131890	sodium:chloride dependent transporter;Smp_131890	16.7448	16.9707	11.9433	8.1381	4.86605	4.32752	5.14766	4.91789	-1.48198	5e-05	0.00235817	17.8661	29.0845	24.8435	15.9701	4.18273	8.35671	10.2052	10.2099	-1.03045	1.50274e-08	1.44414e-05	10.1248	21.5113	19.9692	10.8749	2.19959	5.78609	7.62143	7.22134	-1.51725	3.19171e-08	1.85288e-05	GO:0005215,GO:0005328,GO:0005887,GO:0006810,GO:0006836,GO:0015293,GO:0016020,GO:0016021,GO:0055085	Transporter [Source:UniProtKB/TrEMBL;Acc:G4VP60]	gi|92859670|ref|NP_004202.2|	sodium- and chloride-dependent glycine transporter 2 [Homo sapiens]
Smp_131840	25 kDa integral membrane proteinTetraspanin;Smp_131840	21.4112	21.3109	15.1717	20.0614	9.22197	5.63875	6.98584	12.5823	-1.17902	5e-05	0.00235817	25.0554	38.0451	33.808	44.9924	9.97792	11.5586	14.8567	27.3348	-0.879662	1.81094e-05	0.00342358	12.9771	26.7363	25.6107	28.3279	4.66687	7.58772	10.827	18.7255	-1.16005	5.904e-05	0.00560255	GO:0005887,GO:0007166,GO:0016020,GO:0016021,GO:0045747,GO:0090002	Tetraspanin, putative [Source:UniProtKB/TrEMBL;Acc:G4LW59]	gi|91199546|ref|NP_001035123.1|	CD63 antigen isoform B [Homo sapiens]
Smp_017730	200-kDa GPI-anchored surface glycoprotein;Smp_017730	47.2149	31.3877	29.1966	28.2408	14.5394	9.18073	15.8322	21.9514	-1.14529	5e-05	0.00235817	51.9953	51.5605	57.1443	54.8675	12.8384	17.0633	30.467	44.4084	-0.858862	0.000347592	0.023965	28.8125	38.7945	45.3567	37.6448	6.9066	12.0791	23.0137	31.3159	-1.1544	0.000130419	0.0102151	GO:0005515	200-kDa GPI-anchored surface glycoprotein [Source:UniProtKB/TrEMBL;Acc:G4VP56]	_	_
Smp_045200	tegument-allergen-like protein;Sm22.6;Smp_045200	664.461	243.119	247.27	133.846	82.9589	17.0773	70.3162	78.9352	-2.37003	5e-05	0.00235817	678.243	407.83	510.493	266.238	74.0683	35.3543	131.996	158.622	-1.65386	0.000643386	0.0355964	373.692	275.782	346.931	155.959	35.9458	20.6815	88.9931	99.6522	-2.41945	5.35819e-05	0.00538124	GO:0005509,GO:0005875,GO:0007017,GO:0030286	Tegument antigen [Source:UniProtKB/Swiss-Prot;Acc:P14202]	_	_
Male Upregulated genes in treated worms
geneID	product description	FPKM control 1 cuffquant	FPKM control 2 cuffquant	FPKM control 3 cuffquant	FPKM treated 1 cuffquant	FPKM treated 2 cuffquant	FPKM treated 3 cuffquant	log2(fold change) cuffdiff	p-value cuffdiff	q-value cuffdiff	TPM control 1 kallisto	TPM control 2 kallisto	TPM control 3 kallisto	TPM treated 1 kallisto	TPM treated 2 kallisto	TPM treated 3 kallisto	b sleuth	p-value sleuth	q-value sleuth	TPM control 1 sailfish	TPM control 2 sailfish	TPM control 3 sailfish	TPM treated 1 sailfish	TPM treated 2 sailfish	TPM treated 3 sailfish	log2(fold change) edgeR	p-value edgeR	q-value edgeR	GO terms	UniProt annotation	human homologous: hit	human homologous: hit description
Smp_147140	transient receptor potential cation channel;Smp_147140	8.97626	7.66721	8.56918	14.8891	12.5833	9.9771	0.561528	5e-05	0.000902234	21.6343	16.2219	21.7512	38.796	35.3642	23.2947	0.372888	0.00353624	0.0336031	20.7235	16.3827	20.6518	39.3497	33.4807	23.946	0.576077	0.000394417	0.00661133	GO:0016020,GO:0016021	Putative transient receptor potential cation channel [Source:UniProtKB/TrEMBL;Acc:G4VLW0]	gi|148612863|ref|NP_060142.3|	transient receptor potential cation channel subfamily M member 7 [Homo sapiens]
Smp_136690	acetylcholinesterase;Smp_136690	9.49318	12.0687	12.9141	32.9247	18.0684	18.705	1.02286	5e-05	0.000902234	20.643	25.2443	29.8868	84.8506	45.6901	43.0701	0.68656	0.0028112	0.0288878	19.2552	23.5952	28.1369	80.5793	42.818	40.7454	1.03904	5.0784e-05	0.00136079	GO:0003990,GO:0004104,GO:0005615,GO:0016787,GO:0052689	Family S9 non-peptidase homologue (S09 family) [Source:UniProtKB/TrEMBL;Acc:G4LUT1]	gi|262359974|ref|NP_001160132.1|	neuroligin-3 isoform 3 [Homo sapiens]
Smp_176450	ATP binding cassette sub family A;Smp_176450	0.590117	0.464373	0.553549	2.36326	1.29753	0.983718	1.51566	5e-05	0.000902234	1.82739	1.27365	1.65296	8.93559	4.15018	3.23514	1.03844	0.000372233	0.00727776	1.65841	1.15583	1.50233	8.09575	3.81187	2.96958	1.62507	2.10968e-05	0.000712553	GO:0000166,GO:0005215,GO:0005524,GO:0006200,GO:0006810,GO:0006869,GO:0016020,GO:0016021,GO:0016887,GO:0017111,GO:0042626,GO:0043231,GO:0055085	_	_	_
Smp_206030	retinal specific ATP binding cassette;InterPro:IPR003439 : ABC transporter related;Smp_206030	0.899763	1.02664	0.977011	4.97249	2.9939	1.59589	1.73326	5e-05	0.000902234	2.95018	3.33791	3.67061	21.8867	10.3312	6.47183	1.12635	0.000733224	0.0115221	3.22563	3.69285	3.79462	19.7311	9.54582	5.92276	1.5503	0.000102396	0.00234306	GO:0005215,GO:0005524,GO:0006200,GO:0006810,GO:0006869,GO:0016020,GO:0016021,GO:0016887,GO:0042626,GO:0043231,GO:0055085	WGS project CABG00000000 data, supercontig 1243, strain Puerto Rico [Source:UniProtKB/TrEMBL;Acc:G4M278]	gi|116734710|ref|NP_001080.2|	ATP-binding cassette sub-family A member 3 [Homo sapiens]
Female Upregulated genes in treated worms
geneID	product description	FPKM control 1 cuffquant	FPKM control 2 cuffquant	FPKM control 3 cuffquant	FPKM treated 1 cuffquant	FPKM treated 2 cuffquant	FPKM treated 3 cuffquant	log2(fold change) cuffdiff	p-value cuffdiff	q-value cuffdiff	TPM control 1 kallisto	TPM control 2 kallisto	TPM control 3 kallisto	TPM treated 1 kallisto	TPM treated 2 kallisto	TPM treated 3 kallisto	b sleuth	p-value sleuth	q-value sleuth	TPM control 1 sailfish	TPM control 2 sailfish	TPM control 3 sailfish	TPM treated 1 sailfish	TPM treated 2 sailfish	TPM treated 3 sailfish	log2(fold change) edgeR	p-value edgeR	q-value edgeR	GO terms	UniProt annotation	human homologous: hit	human homologous: hit description
Smp_136690	acetylcholinesterase;Smp_136690	1.41287	1.50615	1.04863	3.47166	4.4518	2.42693	1.36376	5e-05	0.000984357	2.78854	2.69773	1.70967	5.7205	9.08354	4.35588	0.933617	1.92711e-05	0.000739628	2.5554	2.51545	1.57207	5.41887	8.57147	4.11325	1.44115	5.0265e-06	0.000224103	GO:0003990,GO:0004104,GO:0005615,GO:0016787,GO:0052689	Family S9 non-peptidase homologue (S09 family) [Source:UniProtKB/TrEMBL;Acc:G4LUT1]	gi|262359974|ref|NP_001160132.1|	neuroligin-3 isoform 3 [Homo sapiens]
Smp_105220	hypothetical protein;Smp_105220	77.0651	74.766	65.3624	106.156	152.281	128.819	0.796317	5e-05	0.000984357	194.917	171.704	143.837	222.39	363.759	288.632	0.508372	6.0598e-06	0.00028924	185.296	166.758	137.366	215.492	352.859	280.592	0.793709	8.49502e-06	0.000318441		DIF_5 [Source:UniProtKB/TrEMBL;Acc:B8Y6H3]	_	_
Smp_169460	RAB18 member RAS oncogene family;Smp_169460	4.09587	4.39549	2.9606	4.99873	6.81354	5.13303	0.538869	0.00695	0.0496768	8.88693	8.79635	5.823	9.91316	15.1899	10.5519	0.395935	0.00424139	0.0382104	8.49712	8.71445	5.62821	9.92156	15.2141	10.5177	0.637546	0.00220125	0.0205235	GO:0000166,GO:0005525,GO:0005622,GO:0007264	Rab, putative [Source:UniProtKB/TrEMBL;Acc:G4LXV0]	gi|4506363|ref|NP_002861.1|	ras-related protein Rab-13 [Homo sapiens]
Smp_135470	carbonic anhydrase;Smp_135470	0.761565	0.686644	0.441949	1.1269	1.17967	1.42109	0.963236	0.0021	0.0203974	2.01272	1.71194	0.873006	2.65737	3.5627	3.17916	0.743318	0.000746839	0.0111652	1.9256	1.66063	0.864335	2.58562	3.44803	3.07548	1.05253	0.000595867	0.00814443	GO:0004089,GO:0005576,GO:0008270	Carbonic anhydrase-related [Source:UniProtKB/TrEMBL;Acc:G4VIP8]	gi|9951923|ref|NP_001208.2|	carbonic anhydrase-related protein 11 precursor [Homo sapiens]
Smp_156770	major tegumental antigen SM15;Smp_156770	71.1101	91.8878	68.5781	108.092	126.233	115.037	0.569369	0.00035	0.00511389	158.599	180.974	133.508	202.108	254.847	221.705	0.344675	4.43873e-05	0.00141389	146.874	170.973	124.55	190.517	242.366	208.67	0.536084	0.000752722	0.00959531		Major tegumental antigen SM15; Putative major tegumental antigen SM15 [Source:UniProtKB/TrEMBL;Acc:Q05645]	_	_
Schistosomula Upregulated genes in treated worms
geneID	product description	FPKM control 1 cuffquant	FPKM control 2 cuffquant	FPKM control 3 cuffquant	FPKM control 4 cuffquant	FPKM treated 1 cuffquant	FPKM treated 2 cuffquant	FPKM treated 3 cuffquant	FPKM treated 4 cuffquant	log2(fold change) cuffdiff	p-value cuffdiff	q-value cuffdiff	TPM control 1 kallisto	TPM control 2 kallisto	TPM control 3 kallisto	TPM control 4 kallisto	TPM treated 1 kallisto	TPM treated 2 kallisto	TPM treated 3 kallisto	TPM treated 4 kallisto	b sleuth	p-value sleuth	q-value sleuth	TPM control 1 sailfish	TPM control 2 sailfish	TPM control 3 sailfish	TPM control 4 sailfish	TPM treated 1 sailfish	TPM treated 2 sailfish	TPM treated 3 sailfish	TPM treated 4 sailfish	log2(fold change) edgeR	p-value edgeR	q-value edgeR	GO terms	UniProt annotation	human homologous: hit	human homologous: hit description
No DE tegument genes found.
